# Supplementary material for: LowLoad-qPCR: a novel clinical strategy for detecting low-load bacteremia
Source: Research Square preprint supplement (doi:10.21203/rs.3.rs-7749687/v1), 2025-10-21
Supplement: Supplementary file 1 [file cf56a17f5573c64d85b469de.pdf]

## **Supplementary information**

Paula Gómez Estévez, José Miguel Cisneros, José Antonio Lepe, Guillermo Martín-Gutiérrez, José Manuel Ortiz de la Rosa

### **Table-of-contents**

**Supplementary Note 1 | Enhanced qPCR signal through random priming amplification and probe multiplexing**

**Supplementary Figure 1** | Fluorescence amplification curves of qPCR and random priming-qPCR with one and three probes across three bacterial species

**Supplementary Figure 2** | Detection performance across bacterial loads using conventional qPCR or LowLoad-qPCR

**Supplementary Note 2 | Design and selection of the different genes for the detection of the three species**

**Supplementary Table 1** | Primers and probes used for qPCR detection of each bacterial species

## **Supplementary Note 1 | Enhanced qPCR signal through random priming amplification and probe multiplexing**

To evaluate strategies for enhancing qPCR fluorescence signal intensity under low bacterial load conditions, we compared four amplification workflows across *E. coli*, *P. aeruginosa* and *S. aureus*: conventional qPCR with a single hydrolysis probe, qPCR with three probes sharing the same fluorophore targeting the same gene, random priming followed by qPCR with one probe, and random priming followed by qPCR with three probes. The use of three probes substantially increased fluorescence signal intensity and consistently lowered Ct values compared to single-probe qPCR, reflecting improved detection sensitivity. Incorporating a random priming step prior to qPCR resulted in an even greater reduction in Ct values across all species, suggesting enhanced template accessibility and amplification efficiency. When combined, random priming and probe multiplexing yielded the highest signal intensities and earliest amplification onset, highlighting a synergistic effect that improves qPCR performance under limiting conditions (**Supplementary Fig. 1**).

To assess how these improvements impact detection performance, we conducted a broader comparison using clinical-like samples spiked with decreasing bacterial concentrations. Detection rates were measured for each species and sample matrix (PBS, plasma, beads), using both conventional qPCR and LowLoad-qPCR. As shown in the heatmap (**Supplementary Fig. 2**), LowLoad-qPCR consistently achieved higher detection rates across all concentrations. This improvement was especially notable at lower bacterial loads ( $\leq 10^2$  CFU/mL), where conventional qPCR frequently failed. These results confirm that both probe multiplicity and random priming enhance sensitivity and robustness, particularly in complex or low-input samples.

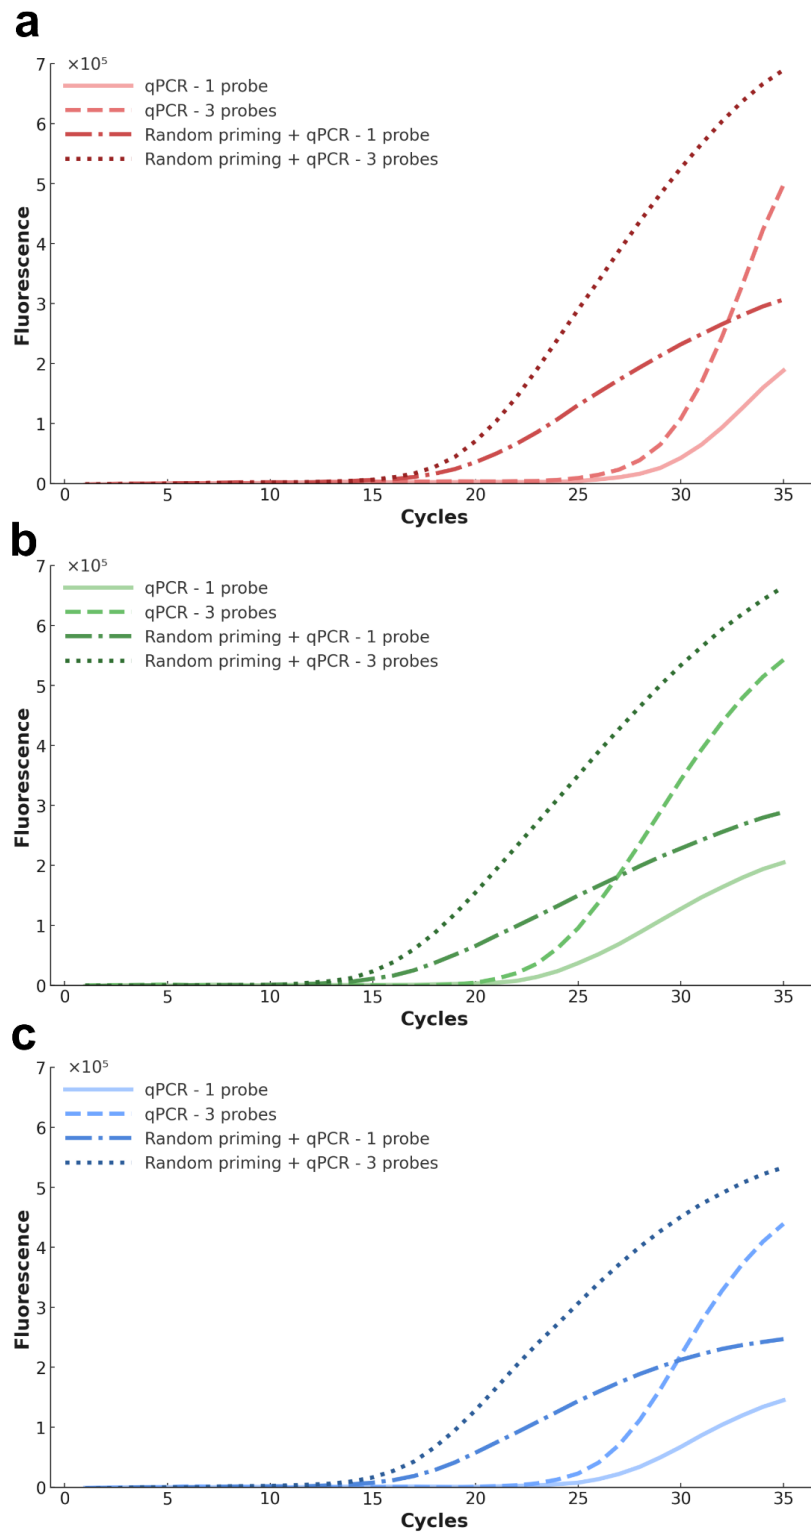

**Supplementary Fig. 1 | Fluorescence amplification curves of qPCR and random priming-qPCR with one and three probes across three bacterial species.** Real-time qPCR fluorescence curves from (a) *E. coli*, (b) *P. aeruginosa*, and (c) *S. aureus* using four amplification conditions. Curves represent  $\Delta Rn$  fluorescence over 35 amplification cycles. All data are baseline-corrected (cycles 1–10). Y-axes are scaled equally ( $0\text{--}7 \times 10^5$ ) to facilitate comparison across conditions and species.

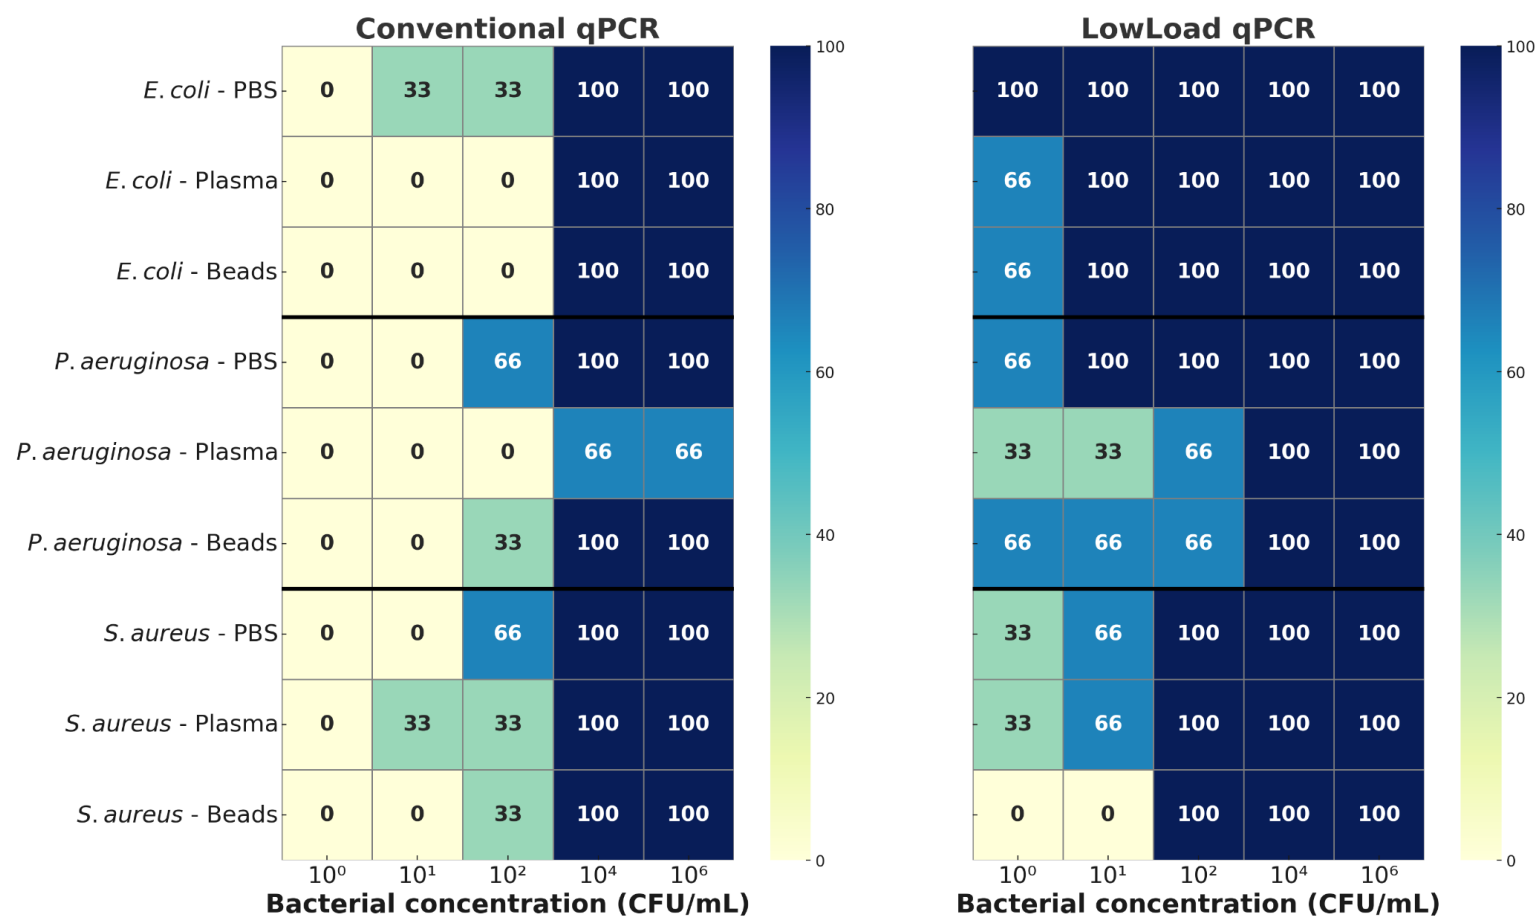

**Supplementary Fig. 2 | Detection performance across bacterial loads using conventional qPCR or LowLoad-qPCR.** Heatmaps display the percentage of positive replicates (n = 3 per condition) for *E. coli*, *P. aeruginosa*, and *S. aureus* spiked into PBS, plasma or bead-treated blood, and tested at five concentrations (10<sup>6</sup>, 10<sup>4</sup>, 10<sup>2</sup>, 10<sup>1</sup>, and 10<sup>0</sup> CFU/mL). LowLoad-qPCR consistently improved detection, particularly in low-burden and complex matrices. Black lines separate bacterial species.

## **Supplementary Note 2 | Design and selection of the different genes for the detection of the three species**

The selection of gene targets for species-specific detection was based on their high specificity, stable genomic presence, and widespread use in molecular diagnostics. Each target—*uidA* for *E. coli*, *gyrB* for *P. aeruginosa*, and *nuc* for *S. aureus*—was amplified using species-specific primers combined with three hydrolysis probes per gene, all labelled with the same fluorophore (FAM) to allow multiplex detection within a single channel.

Probe sequences were either newly designed or adapted from validated qPCR protocols (see references in **Supplementary Table 1**), and were selected to bind distinct, non-overlapping regions of the amplicon. This design aimed to improve detection sensitivity under limiting DNA conditions, while maintaining signal specificity.

All oligonucleotides were synthesized by Microsynth AG (Balgach, Switzerland) and prepared at a final working concentration of 10 µM. Primer and probe sequences are listed in **Supplementary Table 1**.

**Supplementary Table 1** | Primers and probes used for qPCR detection of each bacterial species

| <i>Escherichia coli</i>       |                                       |            |
|-------------------------------|---------------------------------------|------------|
| Gene                          | <i>uidA</i>                           |            |
| Forward primer                | 5'- AGC GAA GAG GCA GTC AA-3'         | This study |
| Reverse primer                | 5'-TGA GCG TCG CAG AAC ATT ACA-3'     | (13)       |
| Probe 1                       | 5'-CGC GTC CGA TCA CCT GCG TC-3'      | (13)       |
| Probe 2                       | 5'-ACC CGT CCG CAA GGT GCA CG-3'      | This study |
| Probe 3                       | 5'-CAG CAG GCG CAC TTA CAG GC-3'      | This study |
| <i>Pseudomonas aeruginosa</i> |                                       |            |
| Gene                          | <i>gyrB</i>                           |            |
| Forward primer                | 5'-TGA CCA TCC GTC GCC ACA AC-3'      | This study |
| Reverse primer                | 5'-ACG CCG GAG TTG AGG AAG GA-3'      | This study |
| Probe 1                       | 5'-TTC CGC AGT TCC CAC TGC G-3'       | This study |
| Probe 2                       | 5'-CGG CTT GAA GTG AAC TTC GGT-3'     | This study |
| Probe 3                       | 5'-CCA CTT CAG TTG GGA CAT CCT G-3'   | This study |
| <i>Staphylococcus aureus</i>  |                                       |            |
| Gene                          | <i>nuc</i>                            |            |
| Forward primer                | 5'-AGT GCT GGC ATA TGT ATG G-3'       | This study |
| Reverse primer                | 5'-AGT CGC AGG TTC TTT ATG TA-3'      | This study |
| Probe 1                       | 5'-CGA AAG GGC AAT ACG CAA AGA GG-3'  | This study |
| Probe 2                       | 5'-CGG CGT AAA TAG AAG TGG TTC TGA-3' | This study |
| Probe 3                       | 5'-AGT CTA AGT AGC TCA GCA AAT GC-3'  | This study |
